# Supplementary material for: Direct Conversion of Human Fibroblasts into Neural Progenitors Using Transcription Factors Enriched in Human ESC-Derived Neural Progenitors
Source: PubMed Central journal article supplement — Stem Cell Reports. 2016 Dec 8;8(1):54–68. doi: 10.1016/j.stemcr.2016.11.006 (PMC5233298; doi:10.1016/j.stemcr.2016.11.006), 2016-12-08
Supplement: mmc1.pdf [file mmc1.pdf]

**Stem Cell Reports, Volume 8**

**Supplemental Information**

**Direct Conversion of Human Fibroblasts into Neural Progenitors Using  
Transcription Factors Enriched in Human ESC-Derived Neural  
Progenitors**

**Pei-Shan Hou, Ching-Yu Chuang, Chan-Hsien Yeh, Wei Chiang, Hsiao-Jung Liu, Teng-Nan  
Lin, and Hung-Chih Kuo**

Figure S1. Related to Figure 1  
A. PAX6:EGFP

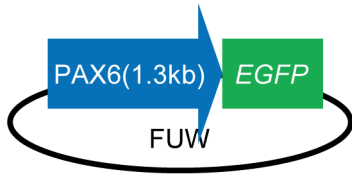

GFP PAX6

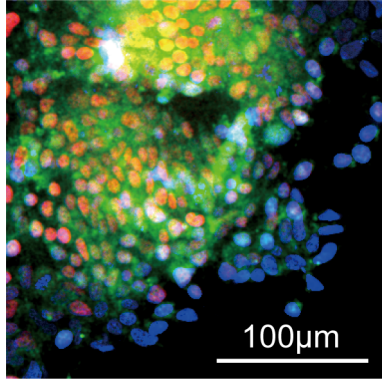

B. SOX1:EGFP

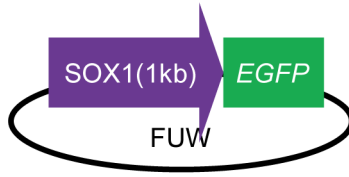

GFP SOX1

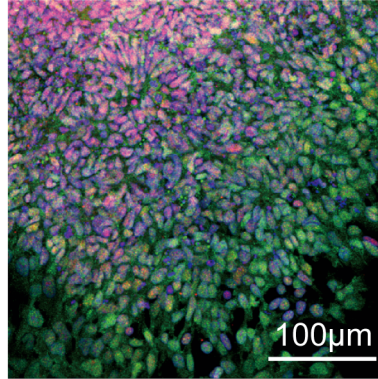

Figure S2. Related to Figure Figures 2 and 3

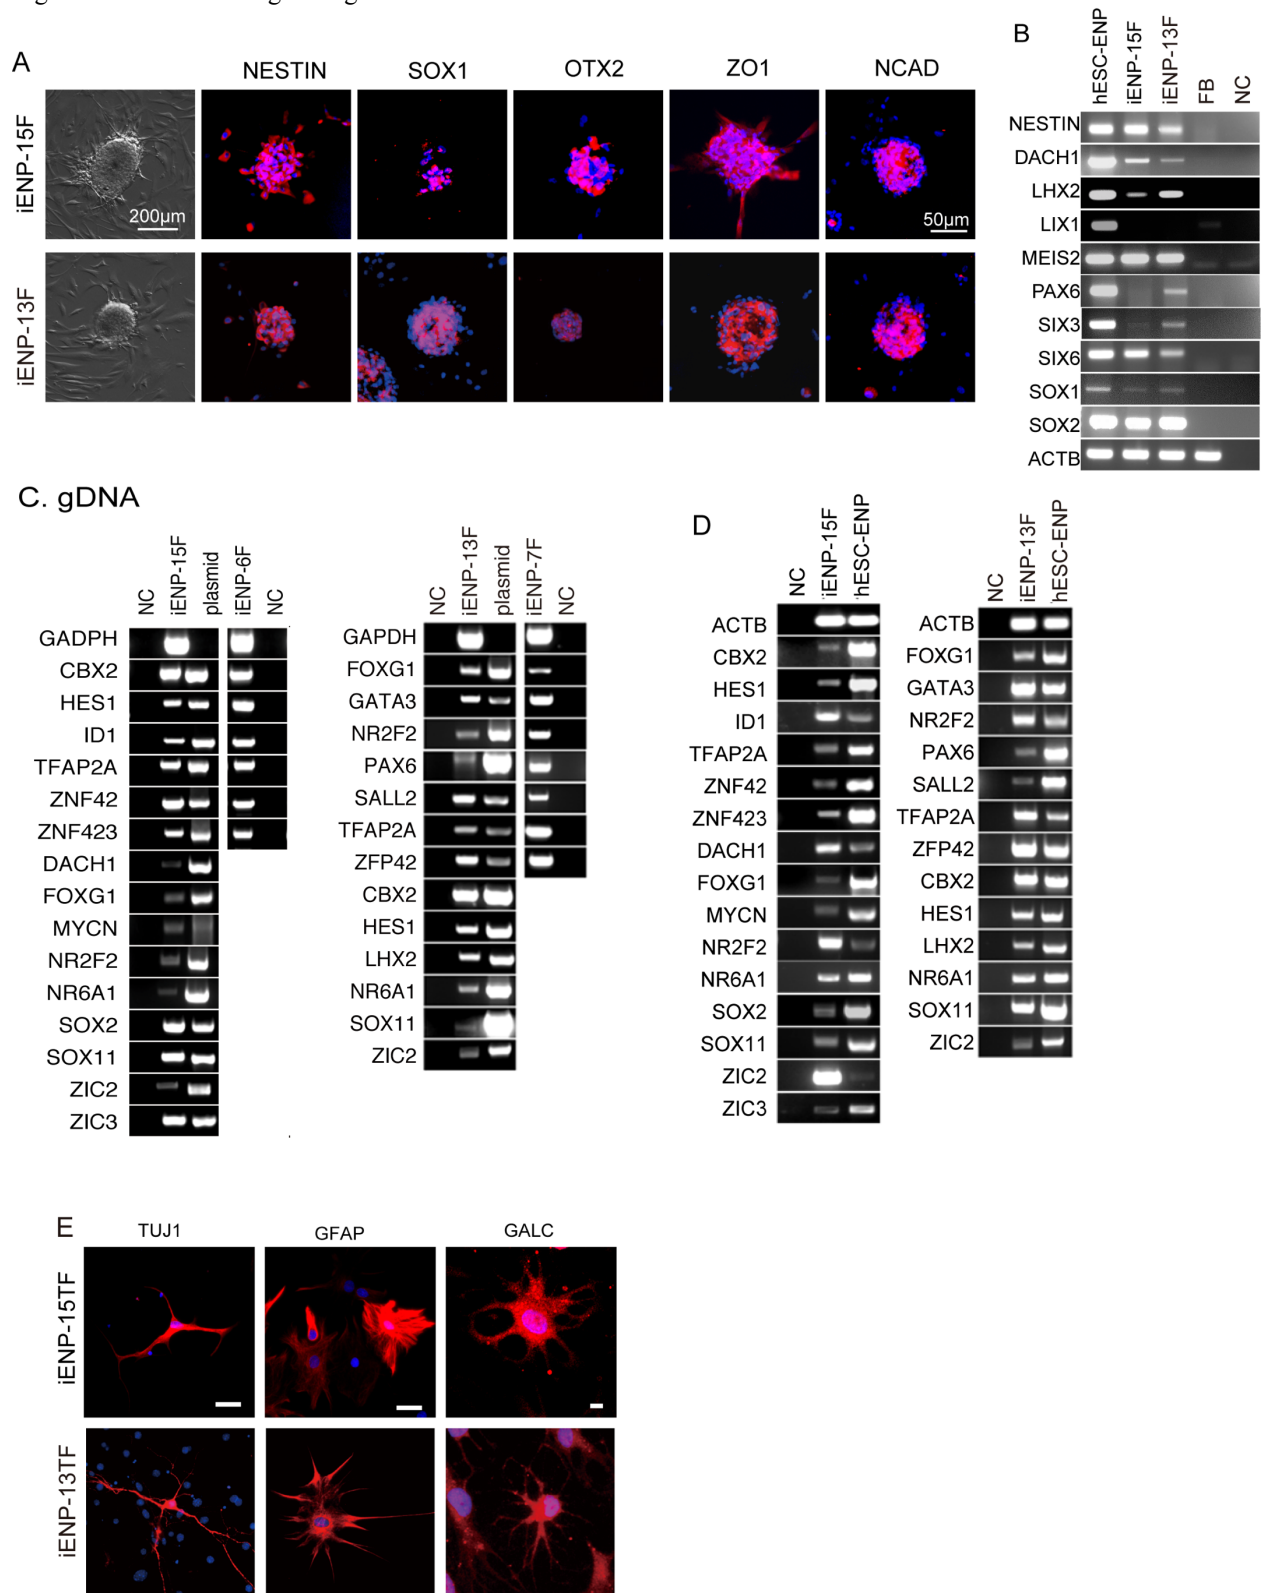

Figure S3: related to Figures 2-5.

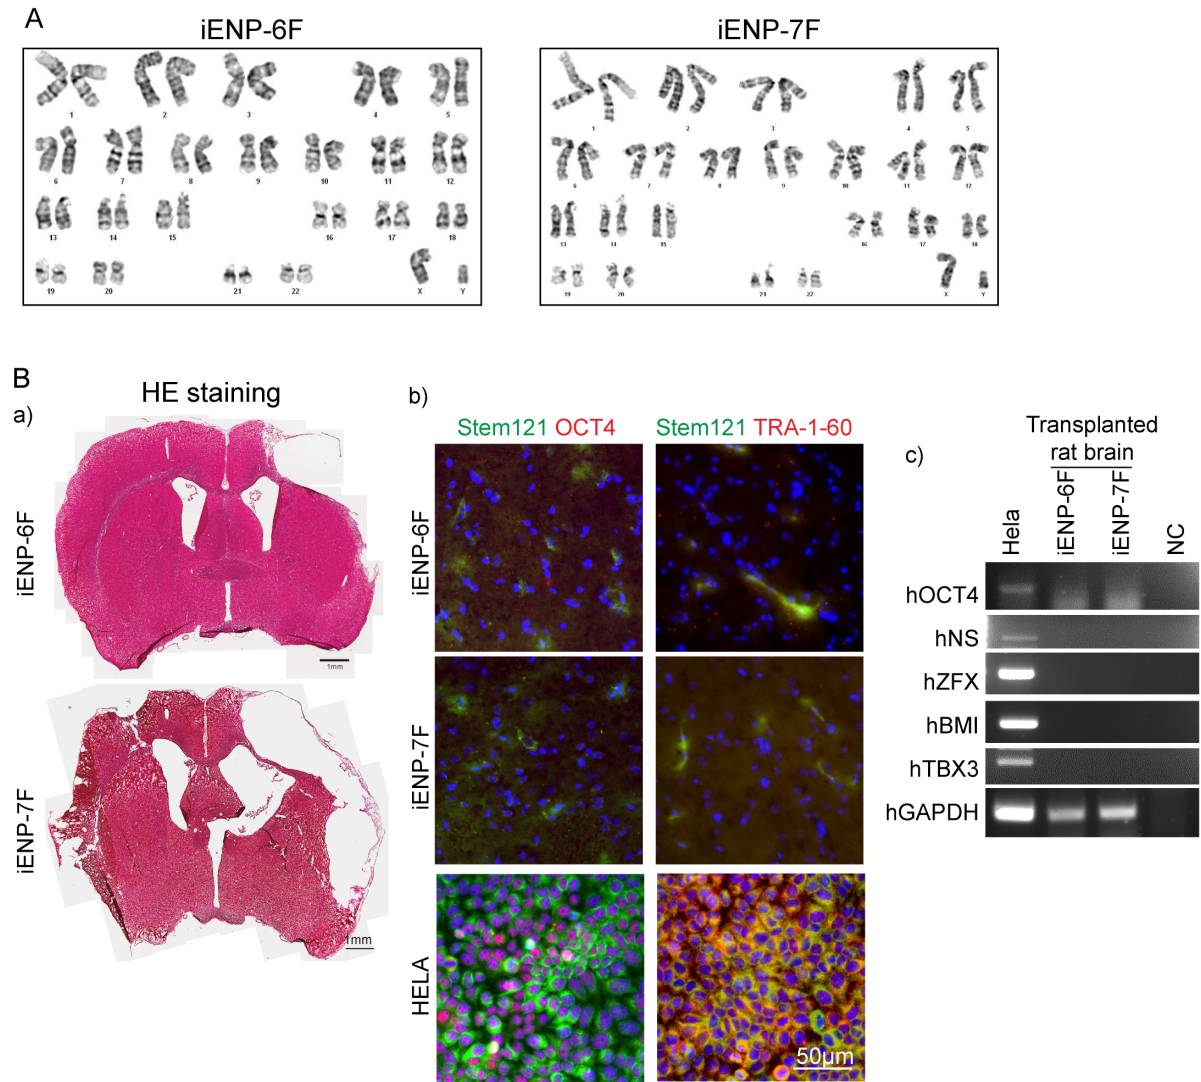

Figure S4: related to Figures 2 and 3.

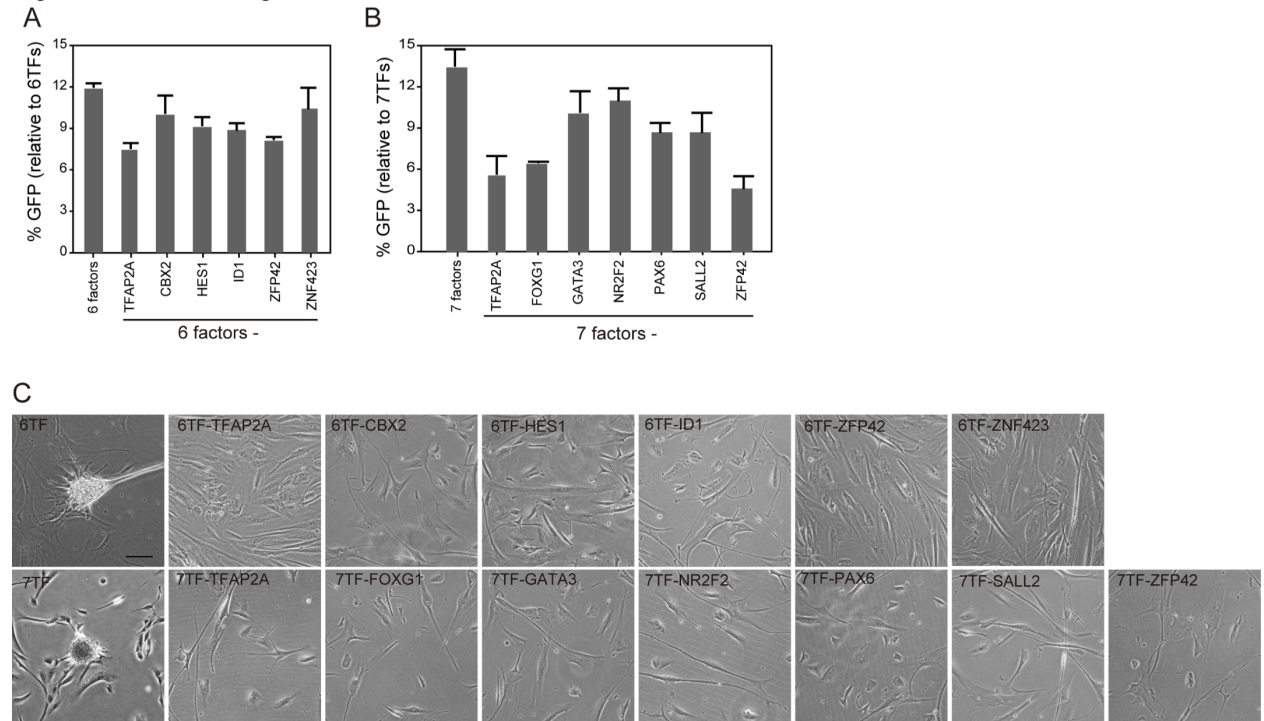



### Supplemental Figure legends

**Figure S1.** Related to Figure 1. Construction and characterization of PAX6:*EGFP* and SOX1:*EGFP* neural reporters.

(A) Schematic drawings of the lentiviral constructs, PAX6:*EGFP* and SOX1:*EGFP*. (B) ICC staining of PAX6:*EGFP*- or SOX1:*EGFP*- transfected hESC-derived neural rosettes (day 20) with antibodies against GFP and PAX6 or SOX1, respectively. Nuclei were counterstained with DAPI (blue).

**Figure S2.** Related to Figure 2 and 3. Characterization of iENP-15F and iENP-13F.

(A) ICC staining of iENPs induced by the 15 (selected by PAX6:*EGFP*) and 13 (selected by SOX1:*EGFP*) TF combinations, using antibodies against the indicated NP markers. Nuclei were counterstained with DAPI (blue). (B) RT-PCR analysis of the indicated genes using mRNA isolated from undifferentiated iENP-15F and -13F. hESC-ENPs and FBs were used as positive and negative controls, separately. (C) PCR analysis of the integration of the indicated exogenous transgenes using genomic DNA isolated from undifferentiated iENP-15F, iENP-6F, iENP-13F, and iENP-7F. The plasmids of indicated genes were used as positive controls. (D) RT-PCR analysis of the indicated endogenous genes using mRNA isolated from undifferentiated iENP-15F and iENP-13F after doxycycline withdrawal. hESC-ENP was used as a positive control. (E) ICC staining of differentiating iENP-15F and iENP-13F with antibodies against TUJ1, GFAP and GALC. Scale bar = 10 $\mu$ m. NC: negative control (H<sub>2</sub>O). Nuclei were counterstained with DAPI (blue).

**Figure S3.** Related to Figures 2–5. Karyotype of undifferentiated iENPs and absence of tumorigenesis of transplanted iENPs.

(A) Karyotype analysis of undifferentiated iENP-6F at passage 20 and iENP-7F at passage 21. (B)(a) H&E staining showed no obvious nuclear aggregation, and (b) IHC staining using a specific antibody against the tumorigenic marker OCT4 or TRA-1-60 showed no colocalization with the human marker Stem121 at 12 weeks after transplantation of iENP-6F and iENP-7F into the MCAO-injured adult rat brain. Nuclei were counterstained with DAPI (blue). (c) RT-PCR analysis using mRNA isolated from transplanted brain tissue showed no expression of the indicated tumorigenic genes. HELA cells were used as a positive control. NC, negative control (H<sub>2</sub>O).

**Figure S4.** Related to Figure 2 and 3. Essential transcription factor combinations for iENP generation.

(A-B) Effect of single TF dropouts from (A) the 6TF-set on the induction of PAX6:*EGFP*<sup>+</sup> cells and (B) 7 TF-set on the induction of SOX1:*EGFP*<sup>+</sup> cells. (C) Phase contrast image showing iENP-like colony formation during induction with the transfected TF combination. No colony formation was observed after individual TFs were removed from the original 6 TF or 7 TF combinations. All quantitative data were obtained from three independent experiments and are presented as means  $\pm$  SD.

**Figure S5.** Related to Figure 7. Generation and characterization of HD-iENP and AD-iENP.

(A) Induction rate of SOX1:*EGFP*<sup>+</sup> (putative iENP-6F) and PAX6:*EGFP*<sup>+</sup> (putative iENP-7F) from HD and AD FBs. All quantitative data were obtained from three independent experiments and are presented as means  $\pm$  SD. (B) ICC staining of AD2- and AD3-iENPs using an antibody specifically against neural marker NES. (C) RT-PCR analysis of the indicated genes using mRNA isolated from undifferentiated HD-iENP-6F, HD-iENP-7F, AD-iENP-6F, and AD-iENP-7F. hESC-ENPs and parental FBs were used as positive and negative controls.

Table S1. Primer Sets Used in this Study, Related to Figure 1, 2, 3 and 6.

Primers used for amplification of 25 transcription factors

| Gene name | Sense strand                    | Antisense strand                  |
|-----------|---------------------------------|-----------------------------------|
| CBX2a     | TCTAGAATGGAGGAGCTGAGCAGCG       | GAATTCTCAGTAATGCCTCAGGTTGAAGAA    |
| DACH1a    | CAATTGATGGCAGTGCCGGCGG          | CGACCAATTGTCAGTACATGACA           |
| DEPDC1a   | ACTAGTATGGAGAGTCAGGGTGTGCCT     | TTCGAATTATCTTAGACTACGGAACTTTGGTTT |
| FOXG1     | GAATTCTGGTCCCAGGGATGTTAATG      | GAATTCATGCTGGACATGGGAGATAGG       |
| GATA3a    | GAATTCATGGAGGTGACGGCGGAC        | GAATTCCTAACCCATGGCGGTGACC         |
| HES1      | GAATTCATGCCAGCTGATATAATGGAGAA   | GAATTCTCAGTTCGCCACGGCC            |
| ID1a      | TCTAGAATGAAAGTCGCCAGTGGCAG      | TTCGAATCAGCGACACAAGATGCGAT        |
| LHX2      | CAAGATCTCGGACCGCTACT            | CCGTGGTCAGCATCTTGTTA              |
| MBD2a     | TCTAGATGGATGCGCGCGCACCC         | TTCGAATTAGGCTTCATCTCCACTGTCC      |
| MYCN      | GAATTCATGCCGAGCTGCTCCACG        | GAATTCCTAGCAAGTCCGAGCGTGTT        |
| MYEF2     | TCTAGAATGGCGGACGCCAACAA         | TTCGAATTATGCATTACGATCCAAGCG       |
| NR2F2a    | GAATTCATGGCAATGGTAGTCAGCAGC     | GAATTCTTATTGAATTGCCATATACGGC      |
| NR6A1a    | GAATTCATGGAGCGGGACGAACCG        | GAATTCTCATTCTTGCCACACTGG          |
| OTX2b     | GAATTCATGATGTCTTATCTTAAGCAACCG  | GAATTCTCACAAAACCTGGAATTTCC        |
| PAX6a     | CAGCCAGAGCCAGCATGCAG            | TTACTGTAATCTTGCCAGTATTG           |
| SALL2     | CAATTGATGTCTCGGCGAAAGCAGC       | CAATTGTCATGGGATCGTGGGGTCA         |
| SIX3      | GCTAGCATGGTATTCCGCTCCCCCTAG     | GCTAGCTCATAACATCACATTCCGAGTCGCTG  |
| SOX1      | GCTAGCATGTACAGCATGATGATGGAGACCG | GCTAGCCTAGATGTGCGTCAGGGGCACC      |
| SOX11     | CAATTGATGGTGCAGCAGGCGGAG        | CAATTGTCAATATGTGAACACCAGGTCG      |
| TFAP2Ab   | GAATTCATGTTAGTTTACAGTTTTTCAGCC  | GAATTCTCACTTTCTGTGCTTCTCCTCTT     |
| ZFP42     | CAATTGATGAGCCAGCAACTGAAGAAAC    | CAATTGCTACTTTCCCTCTTGTTTCATTCTTG  |
| ZIC2      | GAATTCATGCTCCTGGACGCGGG         | GAATTCTCACACGTACCATTTCATTGAAGTT   |
| ZIC3      | TCTAGAATGACGATGCTCCTGGACGG      | GAATTCTCAGACGTACCATTTCGTTAAAATTAG |
| ZNF423    | GAATTCATGCATAAGAAGAGGGTTGAAGAG  | GAATTCTCACTGTGCGTGCTGGCTC         |

Primers for RT-PCR analysis

| Genename  | Sense strand            | Antisense strand         |
|-----------|-------------------------|--------------------------|
| LHX2      | GAAGGGGCGGCCGAGGAAAC    | GCTGGTCACGGTCCAGGTGC     |
| PAX6      | AACAGACACAGCCCTCACAAACA | CGGGAACCTGAACTGGAAGTAC   |
| SOX1      | CAATGCGGGGAGGAGAAGTC    | CTCTGGACAAACTGTGGCG      |
| SOX2      | GGCGGCAACCAGAAAAACAG    | TAATCCGGGTGCTCCTTCATGT   |
| SIX6      | AACAAGAATGAGTCGGTGCT    | CAGCGGGAACCTTCTCCTTA     |
| DACH1     | CCAACGCAAGTTCTAGACCTGG  | GGAAGACAGTCCATCAGGAAACAG |
| MEIS2     | TACCCTTCCGAAGAGCAGAA    | TCACTGCTCGATTTGACTGG     |
| LIX1      | GGAATTTTGGGAAAGCAAGC    | CAGCACTGAAAGTTGCCAAA     |
| SIX3      | CCATCAACAAACACGAGTCG    | TCCTGTAGGTACCACTCCCG     |
| NESTIN    | GCCACCTCACTGCAGTAGTG    | AGTCAGCACATGGGAGTGC      |
| OTX2      | CGCCTTACGCAGTCAATGGG    | CGGGAAGCTGGTGATGCATAG    |
| EMX1      | GAGACGCAGGTGAAGGTGT     | GTTGATGTGATGGGAGCCCT     |
| EN1       | CTGGGTGTACTGCACACGTTAT  | TACTCGCTCTCGTCTTTGTCTT   |
| ISL1      | ATGACAAAATAATATCCAGGGG  | ATTGACCAGTTGCTGAAAAGC    |
| TH        | GTCCCCTGGTCCCAAGAAAAGT  | TCCAGCTGGGGGATATTGTCTTC  |
| AADC      | CTCGGACCAAAGTGATCCAT    | GGGTGGCAACCATAAAGAAA     |
| ACTB      | GAGCACAGAGCCTCGCCTTT    | ACATGCCGGAGCCGTTGTC      |
| OCT4      | GCCGTGAAGCTGGAGAAGGA    | CCCCACATCGGCCTGTGTAT     |
| NS        | CAGAGATCCTCTTGTTGTCAG   | AATGAGGCACCTGTCTCCTC     |
| ZFX       | TGATTCCAGGCAGTACCAAAC   | TGACGAAAACCTTACCACAC     |
| BMI       | TACTCCAGTGCAGTCTCCTC    | TCCCATCTTCTTAACACAG      |
| TBX3      | GAAGAAGAGGTGGAGGACGA    | ATTCAGTTTCGGGGAACAAG     |
| rat GAPDH | GACATGCCGCTGGAGAAAC     | AGCCCAGGATGCCCTTTAGT     |



Primers for endogenous gene expression

| Gene name | Sense strand          | Antisense strand     |
|-----------|-----------------------|----------------------|
| CBX2a     | TGTGTCAAGGGCAGTGCTAC  | ACAAGGTGGAGACCAACAAG |
| DACH1     | CTCTCTCTAACTGGGCATGG  | TCCCATGACGAATGTCTGAC |
| FOXG1     | TCAATGACTTCGCAGAGCAG  | GGTCTGCGTCCACCATATAG |
| GATA3     | ACCCCTGACTATGAAGAAGG  | CACAGCACTAGAGACCCTGT |
| HES1      | AAGTGTGCTGGGGAAGTACC  | TTCCTGTTTAGAGTCCGGAG |
| ID1       | TTGCCCATTTCTGTTTCAGCC | TTCCAACCTCGGATTCCGAG |
| LHX2      | GCTAAGCTGCAACGAAAACG  | GGCGAGATCCTAAAATGTGG |
| MYCN      | ATCCTCAAACGATGCCTTCC  | ATGTGCAAAGTGGCAGTGAC |
| NR2F2     | TCAAGGCCATAGTCTGTTC   | AGTTGTTCTGACCGACACAG |
| NR6A1     | GCAGGAGCTAATCCTGCTG   | TTGGTCTCTCTGGCTTTTCC |
| PAX6      | TTTCAGCACCAAGTGTCTACC | CCCCAGTGGTACAATACAGG |
| SALL2     | GGGAAGCAGTGGTGTTTTAG  | AAGCTGTTTCTGCTCTGTGG |
| SOX2      | CGGCAGCTACAGCATGATG   | TACTCTCCTCTTTTGCACCC |
| SOX11     | GCTACAACGTCGCCAAAGTG  | CGAGAGAAAGAGCGAGCAG  |
| TFAP2A    | ATGCAAAGAGTTCACCGACC  | TCTGTTCTCTTAGGCTCCAC |
| ZFP42     | AGTTGAGGAATAGAGCTGCC  | GCACCATGTCCTAAAACGG  |
| ZIC2      | AGCACATGAAGGTCCATGAG  | TTAGCAGGGAGGTTTGGTTC |
| ZIC3      | GAAGATCTTTGCCCGTTCTG  | GCTACTTTTGGATCTTGCCC |
| ZNF423    | CGAGAACGAGAGAGAGATCC  | CACACTAGCTGTAGCAGGAC |

Primers used for exogenous gene expression analysis

| Gene name  | Sense strand         | Antisense strand (WPRE) |
|------------|----------------------|-------------------------|
| exo-CBX2a  | CAGCAAGAGGGACTGTGTCA | CCACGCCACGTTGCCTGACA    |
| exo-DACH1  | ACAGGGGCTGTTGAAAGTTG | CCACGCCACGTTGCCTGACA    |
| exo-FOXG1  | AGGGCCGCGTCTCTCTC    | CCACGCCACGTTGCCTGACA    |
| exo-GATA3  | GTCCTGTGCGAACTGTCAGA | CCACGCCACGTTGCCTGACA    |
| exo-HES1   | ATCAATGCCATGACCTACCC | CCACGCCACGTTGCCTGACA    |
| exo-ID1    | GTCTGTCTGAGCAGAGCGTG | CCACGCCACGTTGCCTGACA    |
| exo-LHX2   | AGTTCAGGCGCAACCTCTTA | CCACGCCACGTTGCCTGACA    |
| exo-MYCN   | AAACCACAACATCCTGGAGC | CCACGCCACGTTGCCTGACA    |
| exo-NR2F2  | TGCCTGTGGTCTCTCTGATG | CCACGCCACGTTGCCTGACA    |
| exo-NR6A1  | GCTAAAGGTCAGCAACGAGG | CCACGCCACGTTGCCTGACA    |
| exo-PAX6   | GAACAGACACAGCCCTCACA | CCACGCCACGTTGCCTGACA    |
| exo-SALL2  | AGAGAGCAGCAGCAGAAAGG | CCACGCCACGTTGCCTGACA    |
| exo-SOX2   | ACCAGCTCGCAGACCTACAT | CCACGCCACGTTGCCTGACA    |
| exo-SOX11  | AAGAACATCACCAAGCAGCA | CCACGCCACGTTGCCTGACA    |
| exo-TFAP2A | AGAAGCTGTCCACCTAGCCA | CCACGCCACGTTGCCTGACA    |
| exo-ZFP42  | TAGAGCTGCCCTGAGAAAGC | CCACGCCACGTTGCCTGACA    |
| exo-ZIC2   | AGCTCCGGCTATGAGTCGT  | CCACGCCACGTTGCCTGACA    |
| exo-ZIC3   | CCCACACAGGTGAGAAACCT | CCACGCCACGTTGCCTGACA    |
| exo-ZNF423 | TTTGAGAGTGCCGAAGACCT | CCACGCCACGTTGCCTGACA    |

Table S2. Antibodies Used in This Study, Related to Figure 1-7.  
Primary Antibody

| Name          | Company    | Catalog      | Host    | Dilution |
|---------------|------------|--------------|---------|----------|
| BLBP          | Millipore  | ABN14        | Rabbit  | 1:500    |
| $\gamma$ H2AX | Millipore  | 05-636       | Mouse   | 1:500    |
| GABA          | sigma      | A0310        | Mouse   | 1:100    |
| GAL C         | chemicon   | MAB342       | Mouse   | 1:200    |
| GFAP          | Dako       | M0761        | Mouse   | 1:100    |
| GFAP          | Chemicon   | AB5804       | Rabbit  | 1:500    |
| GFP           | abcam      | ab13970      | Chicken | 1:500    |
| HB9           | Santa cruz | sc-22542     | Goat    | 1:200    |
| HOXB4         | DSHB       |              | Rat     | 1:50     |
| Human nuclei  | Chemicon   | MAB1281      | Mouse   | 1:200    |
| ISL1          | DSHB       |              | Mouse   | 1:50     |
| LHX/Lim2      | chemicon   | AB5756       | Rabbit  | 1:200    |
| MAP2          | Chemicon   | AB5622       | Rabbit  | 1:200    |
| MBP           | Chemicon   | AB980        | Rabbit  | 1:10000  |
| NCAD          | Santa cruz | SC8424       | Mouse   | 1:50     |
| Nestin        | chemicon   | MAB5326      | Mouse   | 1:200    |
| Nestin        | Chemicon   | ABD69        | Rabbit  | 1:500    |
| NeuN          | Chemicon   | MAB377       | Mouse   | 1:10     |
| NFH           | Sigma      | N4142        | Rabbit  | 1:200    |
| NG2           | Chemicon   | AB5320       | Rabbit  | 1:200    |
| OCT4          | Santa Cruz | SC-9081      | Rabbit  | 1:50     |
| OTX2          | R&D        | AF1979       | Goat    | 1:100    |
| PAX6          | DSHB       |              | Mouse   | 1:50     |
| AT8           | Thermo     | MN1020       | Mouse   | 1:40     |
| PRPH          | Chemicon   | AB1530       | Rabbit  | 1:200    |
| SOX1          | chemicon   | AB15766      | Rabbit  | 1:100    |
| STEM121       | STEM CELLS | AB-121-U-050 | Mouse   | 1:200    |
| SYP           | DSHB       |              | Mouse   | 1:50     |
| TBR1          | Millipore  | AB10554      | Rabbit  | 1:200    |
| TRA-1-60      | Abcam      | MAB4360      | Mouse   | 1:100    |
| Tuj1          | Chemicon   | MAB1637      | Mouse   | 1:200    |
| Tuj1          | Covance    | MRB-435P     | Rabbit  | 1:10000  |
| ZO1           | Santa Cruz | SC-10804     | Rabbit  | 1:200    |

Secondary antibody

| Host   | Target    | Fluorescence | Company | Catalog     | Dilution |
|--------|-----------|--------------|---------|-------------|----------|
| Donkey | Mouse     | 488          | Thermo  | R37114      | 1:500    |
| Donkey | Mouse     | 594          | Thermo  | R37115      | 1:500    |
| Goat   | Mouse-IgM | Cy3          | Jackson | 115-165-105 | 1:500    |
| Donkey | Rabbit    | 488          | Thermo  | R37118      | 1:500    |
| Donkey | Rabbit    | 594          | Thermo  | R37119      | 1:500    |
| Donkey | Goat      | 488          | Thermo  | A-11055     | 1:500    |
| Goat   | Chicken   | 488          | Thermo  | A-11039     | 1:500    |
| Donkey | Rat       | 594          | Thermo  | A-21209     | 1:500    |

## Supplemental Experimental Procedure

### Construct generation

Constructs carrying candidate neural transcription factors were generated from the coding sequences of *FOXG1*, *GATA3*, *MBD2*, *MYCN* (all from transOMIC technologies), *SOX2* (FUW-teto-*SOX2*; Addgene), *CBX2*, *DACH1*, *DEPDC1*, *HES1*, *ID1*, *LHX2*, *MYEF2*, *NR2F2*, *NR6A1*, *OTX2a*, *PAX6a*, *SALL2*, *SIX3*, *SOX1*, *SOX11*, *TFAP2A*, *ZFP42*, *ZIC2*, *ZIC3*, and *ZNF423* (all from cDNA of hESC H9-derived neural progenitors). The coding sequences were cloned into FUW or FUW-teto vector for further experiments. Reporter constructs were generated by cloning 1.3kb PAX6 P1 promoter (Plaza et al., 1995) and 1kb SOX1 promoter into FUW vector to generate PAX6:*EGFP* and SOX1:*EGFP*, respectively, and UbC:*EGFP* was used as a control.

### Generation of Induced Embryonic Neural Progenitors (iENP)

The iENPs were generated by producing lentiviral particles carrying candidate transcription factors with the use of 293FT cells in accordance with standard procedures. CCD112SK foreskin fibroblasts (FBs), HD FBs isolated from one female patient and one male patient (both *HTT* with 431 CAG repeats), and AD FBs (AD1 with a *APOE4/E4* mutation, AD2 with the *PSEN1* E184D mutation, and AD3 with *PSEN1* P264L from Coriell Cell Repository) were infected with lentiviruses carrying the candidate transcription factor or reporter, and then cultured in FB media [DMEM, 10%FBS]. At one day after infection, media were replaced with neural induction media [DMEM/F12, N2 supplement, 20 $\mu$ g/ml bFGF, 1% NEAA, 2mM glutamine, 1mM sodium pyruvate (Invitrogen), 2 $\mu$ g/ml doxycycline (Sigma), 10ng/ml LIF (Invitrogen), 3 $\mu$ M CHIR99021 (Sigma) and 2 $\mu$ M SB431542 (R&D) (Li et al., 2011)]; media were subsequently replaced every 2 days. After a week of induction, GFP positive cells were purified on a BD FASCARIAII sorter and planted on matrigel-coated dishes with iENP media containing 2 $\mu$ g/ml doxycycline [N2B27: 50% DMEM/F12, 50% Neurobasal, 0.5X N2 supplement, 0.5X B27 supplement, 10 $\mu$ g/ml bFGF, 1% NEAA, 2mM glutamine, 1mM sodium pyruvate, 10ng/ml LIF (Invitrogen), 3 $\mu$ M CHIR99021 (Sigma), and 2 $\mu$ M SB431542 (R&D)] (Figure 1B). Cells spontaneously formed neural sphere-like structures after 2 or 3 days. The neural sphere-like structures were collected and trypsinized into single cells and then plated on ornithine-laminin coated dishes with iENP media containing 2 $\mu$ g/ml doxycycline. The efficiency of iENP generation was measured by combining two parameters: the percentage of GFP positive cells driven by either PAX6:*EGFP* or SOX1:*EGFP* at day 6 post lentiviral infection, and the percentage of neurosphere formation at day 2 post purification. After 2 to 3 passages, doxycycline was removed from culture media and the cells were maintained and subcultivated every 7 days. After 2 passages without doxycycline, iENPs were examined for expression of neural genes, endogenous neural genes, and exogenous genes by RT-PCR analysis, exogenous gene insertion by PCR analysis, and neural gene expression by ICC analysis.

### Chromosome karyotyping

After cell cultures were reach 80% confluence, colcemid solution (KaryoMAX® Colcemid® Solution, 10  $\mu$ g/ml, Invitrogen) were added at a final concentration of 0.05  $\mu$ g/ml for 1 hr to arrest cells in metaphase. Cells were then harvest by trypsin and treated with hypotonic solution (0.075 M potassium chloride solution, SIGMA) for 15 minutes, and subsequently with fresh Carnoy's fixative solution (3:1 ratio of methanol:glacial acetic acid). Standard cytogenetic G-banding procedures was applied for chromosome karyotype analysis.

### Differentiation

General neural differentiation was examined using differentiation media [Neurobasal, B27 supplement, 1% NEAA, 2mM glutamine, 1mM sodium pyruvate (Invitrogen), 300 $\mu$ g/ml dbcAMP, 50 $\mu$ M ascorbic acid (Sigma), 20ng/ml BDNF, 20ng/ml GDNF, 50ng/ml NGF (Peprotech)], while specific neuronal differentiation were examined using cortical neuronal differentiation media (Maroof et al., 2003), dopaminergic neuronal differentiation media (Nguyen et al., 2011), and PNS neuronal differentiation media (Chambers et al., 2012) [cortical neuronal differentiation media: Neurobasal, N2 supplement, B27 supplement (Invitrogen), 100ng/ml SHH, 125ng/ml Noggin, 250ng/ml DKK1, 10ng/ml BDNF, 10ng/ml bFGF (R&D), 2 $\mu$ M XAV939, 100nM LDN93189, 10 $\mu$ M SB431542, 200 $\mu$ M ascorbic acid, 200 $\mu$ M dbcAMP (Sigma); dopaminergic neuronal differentiation media: DMEM/F12, N2 supplement (Invitrogen), 20ng/ml BDNF, 200ng/ml SHH, 100ng/ml FGF8 $\beta$  (R&D), 200 $\mu$ M ascorbic acid (Sigma); PNS neuronal differentiation media: DMEM/F12, N2 supplement (Invitrogen), 3 $\mu$ M CHIR99021, 10 $\mu$ M SU5402, 10 $\mu$ M DAPT, 200 $\mu$ M dbcAMP].

### A $\beta$ measurement

AD-iENP and CCD112sk (CTL)-iENP were plated in 24 well plates (8x10<sup>5</sup> cells/well) and then induced to differentiate into cortical neurons. Media were harvested at 20 days after plating and stored at -80 degree till

analysis. Secreted A $\beta$ 42 and 40 were measured using A $\beta$ 42 and 40 human ELISA kits (KHB3544 and KHB3482, Thermo Fisher Scientific), and detected using a Benchmark plus microplate spectrophotometer (BIO-RAD). Each experiment was performed in biological triplicates.

#### Electrophysiology

For electrophysiological recording, iENP-derived neurons were further co-cultured with mouse glial cells in neuronal maturation media [B27: Neurobasal, B27 supplement, 1% NEAA, 2mM glutamine, 1mM sodium pyruvate (Invitrogen), 20ng/ml BDNF, 20ng/ml GDNF, 50ng/ml NGF (Peprotech)] for 2 weeks. Mouse glial cells were isolated from the brains of P1 ICR mice and subcultivated for more than 3 passages to eliminate neuron contamination, which was confirmed by examination of mouse Tuj1 mRNA and protein expression using RT-PCR analysis and ICC analysis, respectively. Electrophysiological properties were determined by whole cell patch clamp recording at room temperature with external solution [115mM NaCl, 2mM KCl, 10mM HEPES, 1.5mM MgCl<sub>2</sub>, 3mM CaCl<sub>2</sub>, 10mM Glucose. pH 7.4, 300mOsm]; the patch pipettes were 5-10 M $\Omega$  filled with internal solution [130 mM K-gluconate, 10mM NaCl, 2mM MgCl<sub>2</sub>, 10mM HEPES, 0.5mM EGTA, 3mM ATP]. TTX (1 $\mu$ M) in external solution was used to block TTX-sensitive sodium channels. Seal resistance in the whole cell mode was over 1G $\Omega$ . Cells were visualized under a 20X Olympus BX51WI water-immersion lens with Sony CCD; action potentials were recorded in whole cell current-clamp mode, and sodium current was recorded in voltage-clamp mode using a Multiclamp 700B (Molecular Devices) controlled by Signal software and Power 1401 (CED). Results were analyzed using Microsoft Excel 2010.

#### Reverse transcription-polymerase chain reaction, RT-PCR

RNA was extracted with TRIzol reagent following the standard extraction protocol (Molecular Research Center). Extracted RNA was reverse-transcribed into cDNA with SuperScript III Reverse Transcriptase (Invitrogen). Each PCR used 25 ng of cDNA. GoTaq Green Master Mix (Promega) was used for RT-PCR analysis. For quantitative PCR (qPCR), SYBR<sup>®</sup> FAST 2X qRT-PCR Master Mix (KAPA) and a 7900HT Fast Real-Time PCR System (Applied Biosystems) were used. Primers are listed in Table S1.

#### Flow analysis

To evaluate the proportion of GFP-positive cells, cells were dissociated and then resuspended in PBS. The results were recorded and analyzed with a BD FACSCalibur flow cytometer. The effect of withdrawing an individual factor was determined by normalizing the proportion of each set to the control.

#### Cell proliferation and death analysis

iENP-6F, iENP-7F, NP, and GFP control cells were seeded in 24 wells in iENP medium without doxycycline. Cell number was counted at day 1, 2, 3, 4, and 5. Results are shown relative to those of day 1. BrdU (93-3943, Thermo Fisher Scientific) incorporation and TUNEL (G3250, Promega) assays were performed following standard protocols. Images were detected using a Zeiss microscope and Spot software, and analyzed by Metamorph software.

#### Supplemental References

Li, W., Sun, W., Zhang, Y., Wei, W., Ambasadhan, R., Xia, P., Talantova, M., Lin, T., Kim, J., Wang, X., *et al.* (2011). Rapid induction and long-term self-renewal of primitive neural precursors from human embryonic stem cells by small molecule inhibitors. *Proc Natl Acad Sci U S A* 108, 8299-8304.
